# Supplementary material
Source: publisher figshare collection journal article supplement (https://acs.figshare.com/ndownloader/files/13599569)
Supplement: Supplementary file 1 [file 13599569]

## Supporting Information for

# Organic Upconversion Display with an over 100% Photon-to-photon Upconversion Efficiency and a Simple Pixelless Device Structure

*Qiaogang Song<sup>a,b,c</sup>, Tong Lin<sup>b,c</sup>, Zisheng Su<sup>a,b\*</sup>, Bei Chu<sup>b</sup>, Huishan Yang<sup>a\*</sup>, Wenlian Li<sup>b</sup>,*

*Chun-Sing Lee<sup>d\*</sup>*

<sup>a</sup> College of Physics and Information Engineering, Key Laboratory of Information

Functional Material for Fujian Higher Education, Quanzhou Normal University,

Quanzhou 362000, P. R. China

<sup>b</sup> State Key Laboratory of Luminescence and Applications, Changchun Institute of

Optics, Fine Mechanics and Physics, Chinese Academy of Sciences, Changchun

130033, P.R. China

<sup>c</sup> University of Chinese Academy of Sciences, Beijing 100049, P. R. China

<sup>d</sup> Center of Super-Diamond and Advanced Films (COSDAF) and Department of Chemistry, City University of Hong Kong, Hong Kong SAR, P. R. China

\*E-mail: [suzs@ciomp.ac.cn](mailto:suzs@ciomp.ac.cn) (Zisheng Su); [yanghuishan1697@163.com](mailto:yanghuishan1697@163.com) (HuishanYang);

[apcslee@cityu.edu.hk](mailto:apcslee@cityu.edu.hk) (Chun-Sing Lee)

### 1. Calculation of the responsivity and detection external quantum efficiency of the devices

The responsivity ( $R$ ) of the devices is calculated with the formula:

$$R = \frac{J_{ph}}{P_{in}} = \frac{J_{total} - J_{dark}}{P_{in}} \quad (1)$$

where the  $J_{ph}$  is the photocurrent density of the NIR photodetector under illumination,  $J_{total}$  is the total current density measured under illumination,  $J_{dark}$  is the dark current, and  $P_{in}$  is the incident power density of the NIR laser. Then the detection external quantum efficiency ( $EQE_{det}$ ) can be expressed as:

$$EQE_{det} = \frac{hc}{\lambda} \times R = \frac{1240}{\lambda} \times R \quad (2)$$

where  $h$  is the Planck constant,  $c$  is the speed of light, and  $\lambda$  is the wavelength of the incident NIR laser. The  $J_{total}$  of the NIR photodetector ITO/PbPc (60 nm)/C<sub>60</sub> (65 nm)/Al (100 nm) under incident of an 808 nm NIR laser with a power density of 0.052 mW/cm<sup>2</sup> and the  $J_{dark}$  at -10 V are 17.79 and 11.19 mA/cm<sup>2</sup>, respectively. Thus  $R$  of the NIR photodetector is calculated to be 127 A/W. Correspondingly, the  $EQE_{det}$  is  $1.95 \times 10^4$  %.

## 2. Calculation of the emission external quantum efficiency of the devices

The emission external quantum efficiency ( $\text{EQE}_{\text{em}}$ ) is determined by the ratio between the numbers of emitted photons ( $n_p$ ) and injected electrons ( $n_e$ ), which can be calculated with:

$$\text{EQE}_{\text{em}} = \frac{n_p}{n_e}$$

(3)

The  $n_e$  can be obtained from the measured current ( $I_c$ ) of the devices:

$$n_e = \frac{I_c}{q_0}$$

(4)

where  $q_0$  the charge of elementary carrier. The  $n_p$  can be expressed as:

$$n_p = \int n(\lambda) d\lambda = \alpha \int I(\lambda) d\lambda$$

(5)

where  $n(\lambda)$  is the number of emitted photons at a single wavelength  $\lambda$ ,  $I(\lambda)$  is the relative emission intensity at a single wavelength  $\lambda$  which can be obtained from the EL

spectrum of the device, and  $\alpha$  is a factor between  $n(\lambda)$  and  $I(\lambda)$ . The relationship of photon flux ( $F$ ) and irradiation flux  $P(\lambda)$  is:

$$F = \int K_m \phi(\lambda) P(\lambda) d\lambda$$

(6)

where  $K_m$  is photo-power equivalent and equates 683 lm/W,  $\phi(\lambda)$  is visible function.

Meanwhile, the relationship between  $F$  and luminance ( $L$ ) is:

$$L = \frac{dF}{S \cos \theta d\Omega}$$

(7)

where  $S$  is emission area of the device,  $\theta$  is the angle between the measurement direction and vertical direction of emission area, and  $\Omega$  is the space angle. In our devices,  $\theta$  is 0 and  $\Omega$  equates  $\pi$  due to the bottom emission of the devices. Then the relationship between  $F$  and  $L$  is:

$$F = LS\pi$$

(8)

In addition:

$$P(\lambda) = h\nu n(\lambda) = \frac{hc}{\lambda} n(\lambda)$$

(9)

where  $\nu$  is photon frequency. From expressions (5), (6), (8), and (9) we obtain:

$$\int K_m \phi(\lambda) \frac{hc}{\lambda} n(\lambda) d\lambda = \int K_m \phi(\lambda) \frac{hc}{\lambda} \alpha I(\lambda) d\lambda = \pi SL$$

(10)

Then the factor  $\alpha$  can be expressed as:

$$\alpha = \frac{\pi SL}{K_m hc} \frac{1}{\int \frac{\phi(\lambda) I(\lambda)}{\lambda} d\lambda}$$

(11)

and the emitted photon number is:

$$n_p = \frac{\pi SL}{K_m hc} \frac{\int I(\lambda) d\lambda}{\int \frac{\phi(\lambda) I(\lambda)}{\lambda} d\lambda}$$

(12)

Then the EQE<sub>em</sub> can be calculated with the formula:

$$\text{EQE}_{\text{em}} = \frac{LS}{I_c} \frac{\pi q_0}{K_m hc} \frac{\int I(\lambda) d\lambda}{\int \frac{\phi(\lambda) I(\lambda)}{\lambda} d\lambda}$$

(13)

Thus we can obtain the  $\text{EQE}_{\text{em}}$  from the measured current  $I_c$ , luminance  $L$ , device area

$S$ , and EL spectrum (determines  $I(\lambda)$ ).

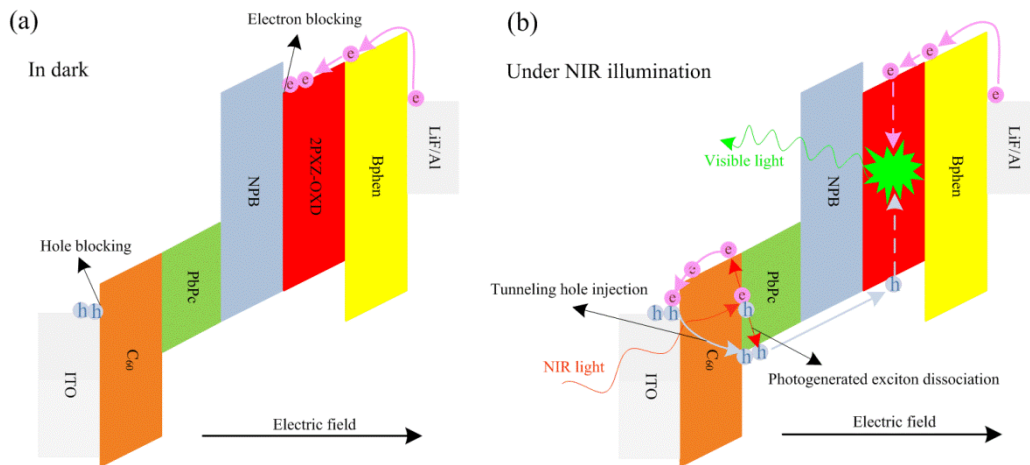

**Figure S1.** Schematic operation principles of the upconverter in dark and under NIR illumination.

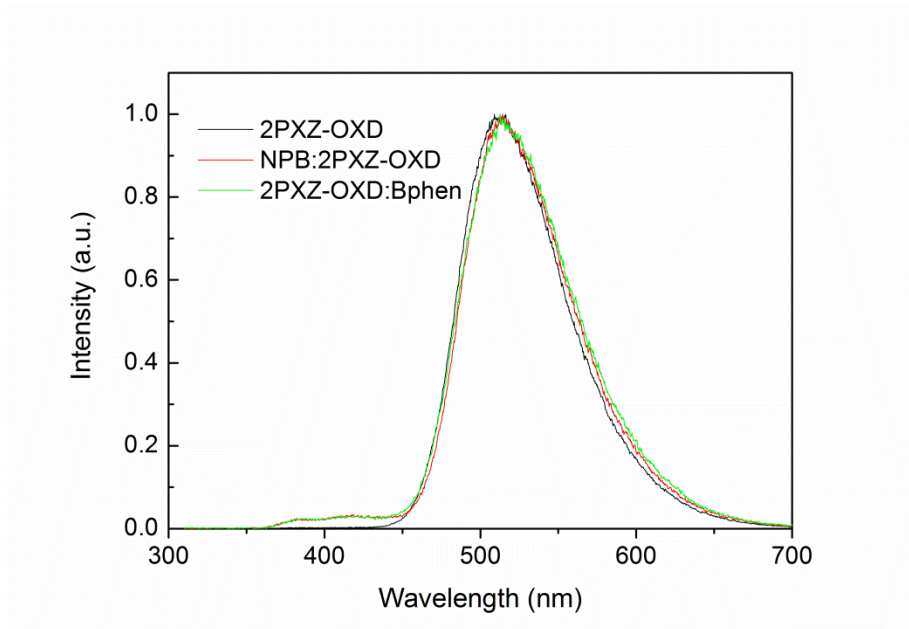

**Figure S2.** Normalized PL spectra from 30 nm films of 2PXZ-OXD, NPB:2PXZ-OXD (1:1), and 2PXZ-OXD:Bphen (1:1). The similar PL spectra confirm that 2PXZ-OXD forms exciplex with neither NPB nor Bphen.

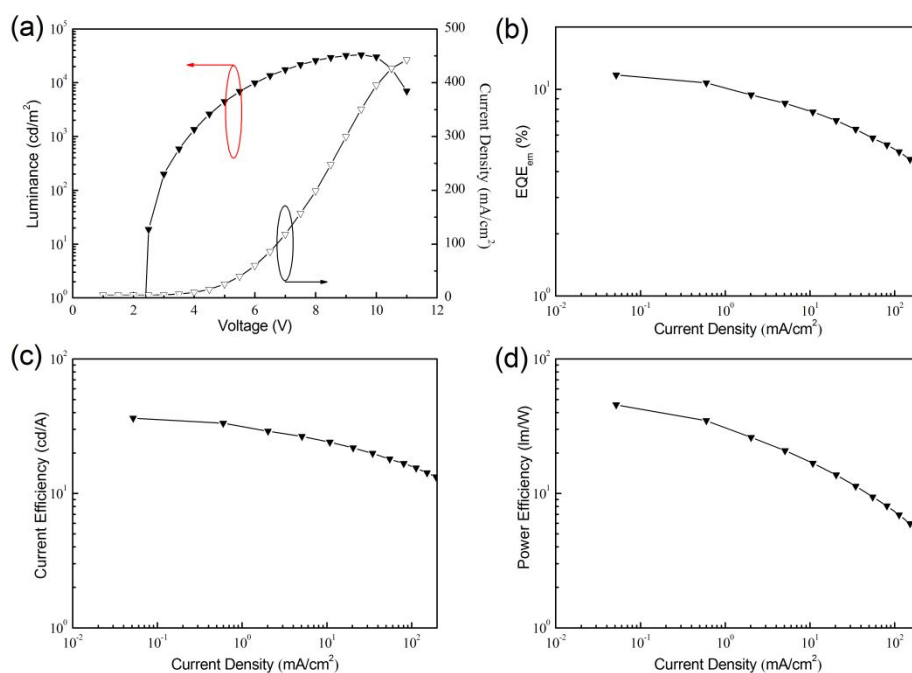

**Figure S3.** (a) Luminance-current density-voltage, (b) EQE-current density, (c) current efficiency-current density, and (d) power efficiency-current density characteristics of the non-doped TADF-OLED with a structure of ITO/NPB (30 nm)/2PXZ-OXD (30 nm)/Bphen (30 nm)/LiF (1 nm)/Al (100 nm).



**Table S1.** Comparison of the turn-on voltage ( $V_T$ ), luminance ( $L$ ), and emission external quantum efficiency ( $\text{EQE}_{\text{em}}$ ) of the OLED in this work to the other reported state-of-the-art non-doped TADF-OLEDs.

| Device                                             | $V_T$<br>[V] | $L$<br>[cd/m <sup>2</sup> ] | $\text{EQE}_{\text{em}}$<br>[%] | Ref.      |
|----------------------------------------------------|--------------|-----------------------------|---------------------------------|-----------|
| ITO/NPB/2PXZ-OXD/Bphen/LiF/Al                      | 2.4          | 199@3 V                     | 11.7                            | This work |
| ITO/MoO <sub>3</sub> /mCP/DMAC-BP/TPBi/LiF/Al      | 2.6          | 100@3 V                     | 18.9                            | [1]       |
| ITO/PEDOT:PSS/TAPC/mCP/DMAC-TRZ/DPPs/3TPYMB/LiF/Al | 3.0          | 100@~4.5V                   | 20                              | [2]       |
| ITO/TAPC/DBT-BZ-DMAC/TmPyPB/LiF/Al                 | 2.7          | 100@~3.4V                   | 14.2                            | [3]       |
| ITO/TAPC/DBT-BZ-PXZ/TmPyPB/LiF/Al                  | 2.7          | 100@~3.6V                   | 9.7                             | [4]       |

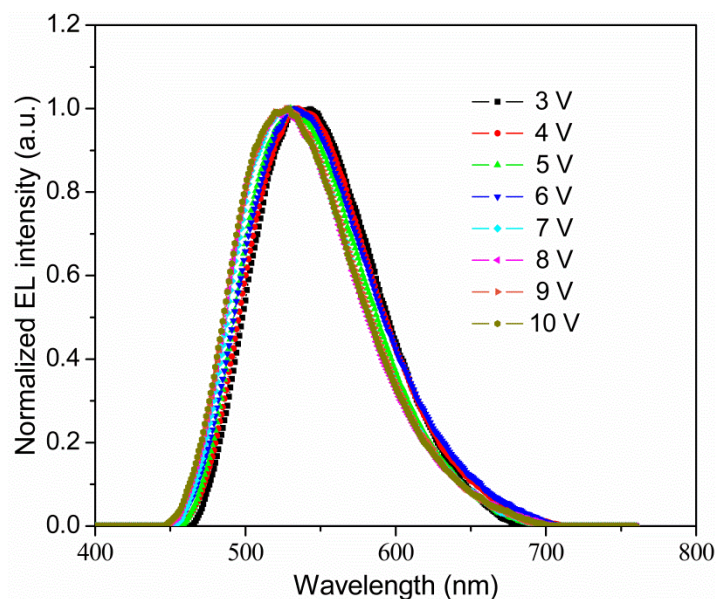

**Figure S4.** Normalized EL spectra of the TADF-OLED ITO/NPB (30 nm)/2PXZ-OXD (30 nm)/Bphen (30 nm)/LiF (1 nm)/Al (100 nm) at different applied voltages.

**Table S2.** Turn-on voltage ( $V_T$ ), luminance ( $L$ ), emission external quantum efficiency ( $\text{EQE}_{\text{em}}$ ), detection external quantum efficiency ( $\text{EQE}_{\text{det}}$ ), photon to photon conversion efficiency ( $\eta_{\text{photon}}$ ), and power to power conversion efficiency ( $\eta_{\text{power}}$ ) of the NIR-upconverter under illumination of an 808 nm laser with different intensity.

| Illumination<br>intensity<br>[mW/cm <sup>2</sup> ] | $V_T$ | $L^a$                | $L^b$                | $\text{EQE}_{\text{em}}^a$ | $\text{EQE}_{\text{em}}^b$ | $\text{EQE}_{\text{det}}^a$ | $\text{EQE}_{\text{det}}^b$ | $\eta_{\text{photon}}^a$ | $\eta_{\text{photon}}^b$ | $\eta_{\text{power}}^a$ | $\eta_{\text{power}}^b$ |
|----------------------------------------------------|-------|----------------------|----------------------|----------------------------|----------------------------|-----------------------------|-----------------------------|--------------------------|--------------------------|-------------------------|-------------------------|
|                                                    | [V]   | [cd/m <sup>2</sup> ] | [cd/m <sup>2</sup> ] | [%]                        | [%]                        | [%]                         | [%]                         | [%]                      | [%]                      | [%]                     | [%]                     |

|       |     |      |      |     |     |      |       |     |      |     |      |
|-------|-----|------|------|-----|-----|------|-------|-----|------|-----|------|
| 0     | 7.5 | -    | 116  | -   | 2.5 | -    | -     | -   | -    | -   | -    |
| 0.052 | 3.1 | 0.9  | 271  | 5.9 | 1.7 | 14.4 | 14733 | 0.8 | 256  | 1.3 | 398  |
| 0.10  | 2.5 | 1.8  | 282  | 5.5 | 1.8 | 16.3 | 7436  | 0.9 | 138  | 1.4 | 214  |
| 0.33  | 2.4 | 5.0  | 288  | 5.6 | 1.9 | 12.5 | 2306  | 0.7 | 43   | 1.1 | 66.3 |
| 1.09  | 2.3 | 13.1 | 319  | 6.7 | 1.9 | 8.7  | 740   | 0.6 | 14.4 | 0.9 | 22.3 |
| 2.13  | 2.2 | 39.5 | 546  | 8.6 | 2.8 | 10.6 | 440   | 0.9 | 12.6 | 1.4 | 19.5 |
| 3.09  | 2.2 | 93.7 | 991  | 9.4 | 9.4 | 15.8 | 467   | 1.5 | 15.7 | 2.3 | 24.4 |
| 4.91  | 2.0 | 196  | 1903 | 8.3 | 4.4 | 23.7 | 432   | 2.0 | 19.0 | 3.0 | 29.5 |
| 9.06  | 2.0 | 210  | 2893 | 7.8 | 5.2 | 14.6 | 279   | 1.2 | 15.6 | 1.8 | 24.3 |
| 18.68 | 2.0 | 294  | 4321 | 5.9 | 4.1 | 13.1 | 276   | 0.8 | 11.3 | 1.2 | 17.6 |
| 33.75 | 2.0 | 307  | 4705 | 5.6 | 3.8 | 7.9  | 179   | 0.4 | 6.8  | 0.7 | 10.6 |
| 52.46 | 2.0 | 329  | 5870 | 5.8 | 3.9 | 5.3  | 142   | 0.3 | 5.5  | 0.5 | 8.5  |

---

a) at voltage of 3 V; b) at voltage of 15 V

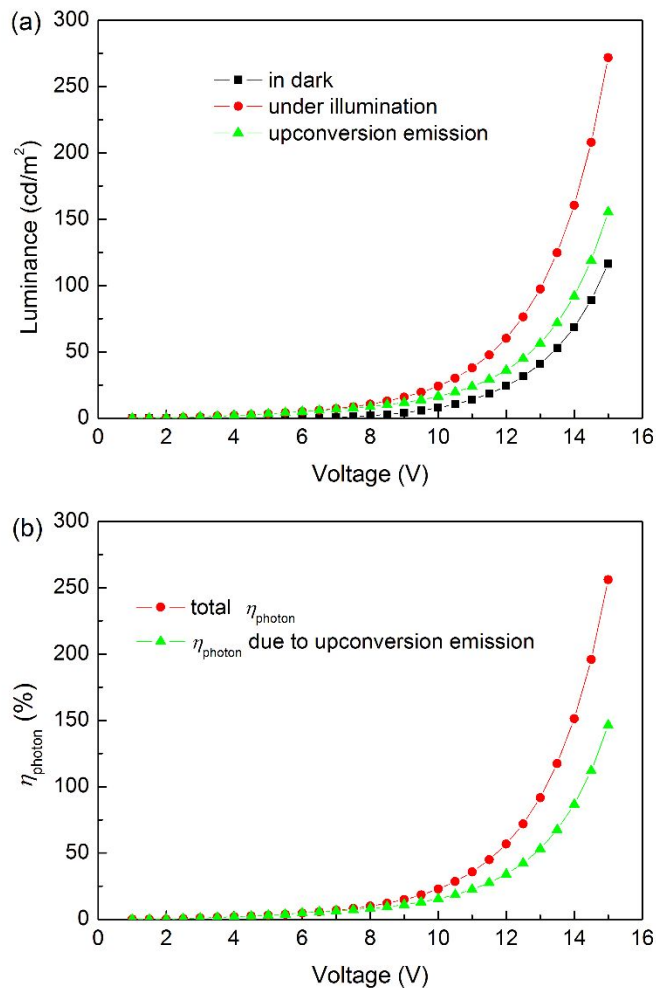

**Figure S5.** (a) Luminance of the the NIR-upconverter in dark (■), under illumination of NIR laser with an intensity of 0.052 mW/cm<sup>2</sup> (●), and the upconversion emission (▲) obtained by ● - ■; (b) Total photon to photon conversion efficiency ( $\eta_{\text{photon}}$ ) (●) and  $\eta_{\text{photon}}$  due to the upconversion (▲) of the NIR-upconverter.

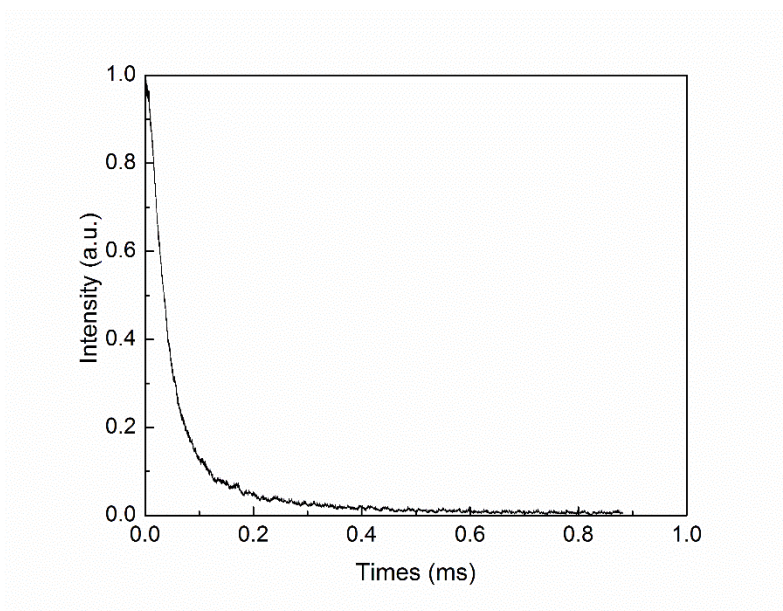

**Figure S6.** Response speed of the upconversion emission of the device at 3 V to the excitation of an 808 laser.

References:

- (1) Zhang, Q.; Tsang, D.; Kuwabara, H.; Hatae, Y.; Li, B.; Takahashi, T.; Lee, S. Y.; Yasuda, T.; Adachi, C. Nearly 100% internal quantum efficiency in undoped electroluminescent devices employing pure organic emitters. *Adv. Mater.* **2015**, *27*, 2096-2100.

- (2) Tsai, W.-L.; Huang, M.-H.; Lee, W.-K.; Hsu, Y.-J.; Pan, K.-C.; Huang, Y.-H.; Ting, H.-C.; Sarma, M.; Ho, Y.-Y.; Hu, H.-C.; Chen, C.-C.; Lee, M.-T.; Wong, K.-T.; Wu, C.-C. A versatile thermally activated delayed fluorescence emitter for both highly efficient doped and non-doped organic light emitting devices. *Chem. Commun.* **2015**, *51*, 13662-13665.
- (3) Guo, J.; Li, X.-L.; Nie, H.; Luo, W.; Gan, S.; Hu, S.; Hu, R.; Qin, A.; Zhao, Z.; Su, S.-J.; Tang, B. Z. Achieving high-performance nondoped OLEDs with extremely small efficiency roll-off by combining aggregation-induced emission and thermally activated delayed fluorescence. *Adv. Funct. Mater.* **2017**, *27*, 1606458.
- (4) Guo, J.; Li, X.-L.; Nie, H.; Luo, W.; Hu, R.; Qin, A.; Zhao, Z.; Su, S.-J.; Tang, B. Z. Robust luminescent materials with prominent aggregation-induced emission and thermally activated delayed fluorescence for high-performance organic light-emitting diodes. *Chem. Mater.* **2017**, *29*, 3623-3631.
